# Supplementary material
Source: Springer Nature journal article supplement (https://www.springermedizin.de/resource/supplementary/13032_2008_14_MOESM8_ESM.pdf/9651438)

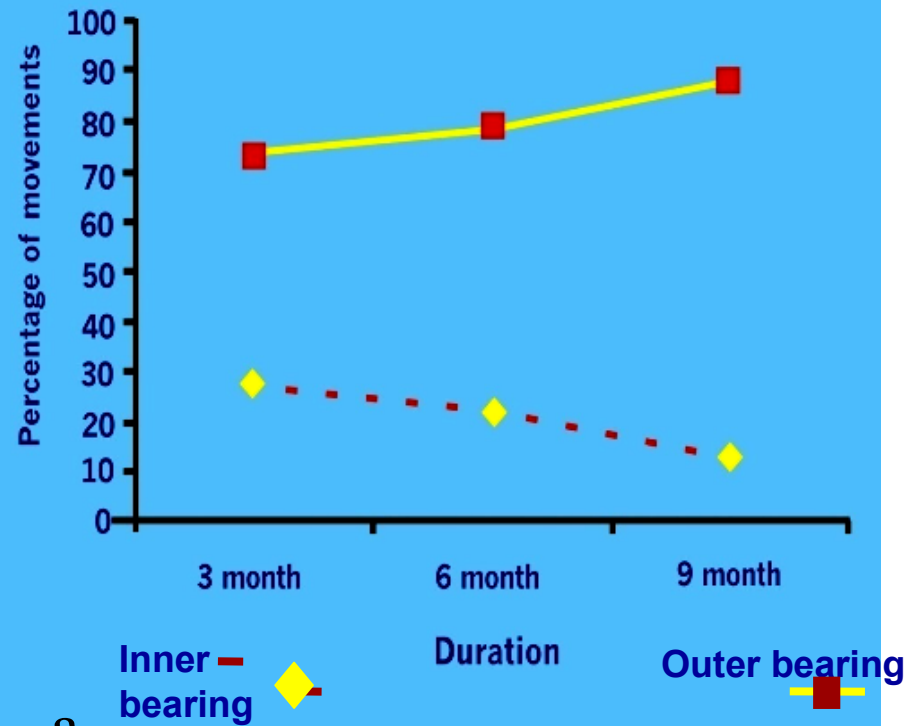

a

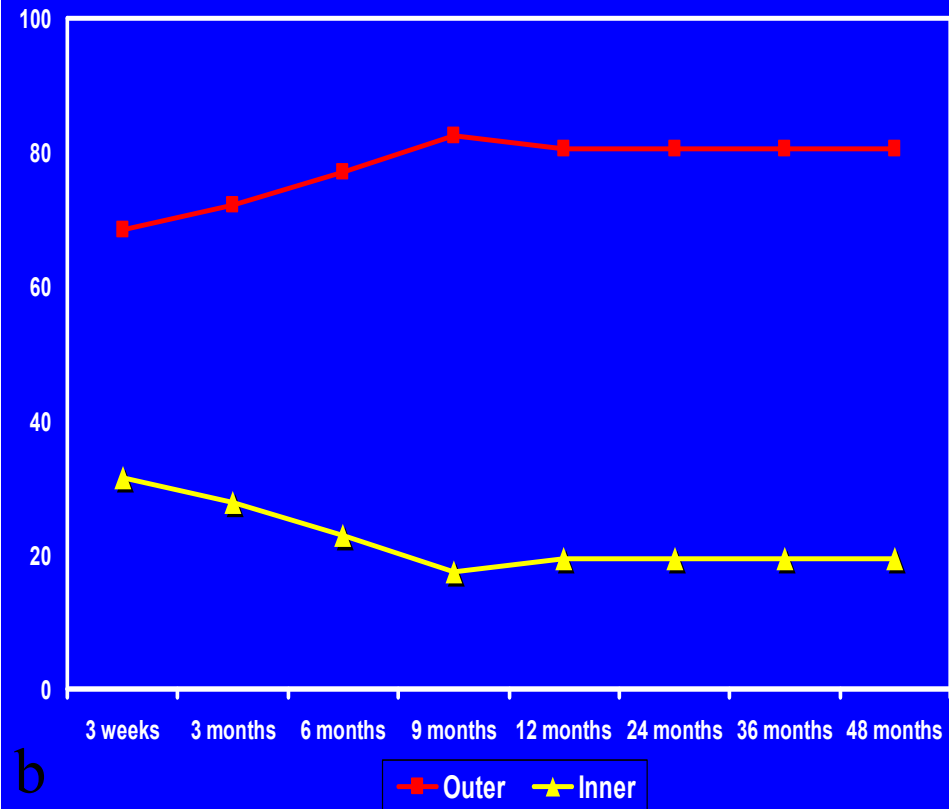

b

Supplement: MOESM8 [file 9651438]
